# Supplementary material for: The effect of metformin on survival of patients with pancreatic cancer: a meta-analysis
Source: PubMed Central journal article supplement (PMC5517652; doi:10.1038/s41598-017-06207-x), 2017-07-19

**The effect of metformin on survival of patients with pancreatic cancer: a  
meta-analysis**

Xiaogang Li<sup>1,3</sup>, Tong Li<sup>2</sup>, Zhiqiang Liu<sup>1</sup>, Shanmiao Gou<sup>1\*</sup>, Chunyou Wang<sup>1\*</sup>

**Supplementary Table S1 Quality assessment of the two RCTs.**

| Study       | Blinding method | Randomization | Generation of random sequence                   | Withdrawals | Allocation concealment | Jadad score |
|-------------|-----------------|---------------|-------------------------------------------------|-------------|------------------------|-------------|
| Kordes 2016 | Double-blinded  | Yes           | Computer-generated permuted-block randomisation | 0/0         | Yes                    | 5           |
| Reni 2015   | None            | Yes           | Unclear                                         | 0/0         | Unclear                | 2           |

**Supplementary Table S2 NOS scores of the nine retrospective cohort studies.**

| Study            | Selection                      |                              |                                  |                                           | Comparability                               | Outcome                      |                                                           |                                                       | Overall Quality |
|------------------|--------------------------------|------------------------------|----------------------------------|-------------------------------------------|---------------------------------------------|------------------------------|-----------------------------------------------------------|-------------------------------------------------------|-----------------|
|                  | <i>Representative of cases</i> | <i>Selection of controls</i> | <i>Ascertainment of exposure</i> | <i>Outcomes present at start of study</i> | <i>Comparability the design or analysis</i> | <i>Assessment of outcome</i> | <i>Adequate follow-up time (<math>\geq 1</math> year)</i> | <i>Adequacy of follow-up (<math>\geq 80\%</math>)</i> |                 |
| Ambe 2015        | 1                              | 1                            | 1                                | –                                         | 2                                           | 1                            | 1                                                         | –                                                     | 7               |
| Amin 2016        | 1                              | 1                            | 1                                | –                                         | 2                                           | 1                            | 1                                                         | –                                                     | 7               |
| Cerullo 2016     | 1                              | 1                            | 1                                | 1                                         | 2                                           | 1                            | 1                                                         | –                                                     | 8               |
| Chaiterakij 2016 | 1                              | 1                            | 1                                | 1                                         | 2                                           | 1                            | 1                                                         | –                                                     | 8               |
| Choi 2016        | 1                              | 1                            | 1                                | –                                         | 2                                           | 1                            | 1                                                         | –                                                     | 7               |
| Hwang 2013       | 1                              | 1                            | 1                                | –                                         | 2                                           | 1                            | 1                                                         | –                                                     | 7               |
| Kozak 2016       | 1                              | 1                            | 1                                | 1                                         | 2                                           | 1                            | 1                                                         | –                                                     | 8               |
| Lee 2016         | 1                              | 1                            | 1                                | –                                         | 2                                           | 1                            | 1                                                         | –                                                     | 7               |
| Sadeghi 2012     | 1                              | 1                            | 1                                | 1                                         | 2                                           | 1                            | 1                                                         | –                                                     | 8               |

**Supplementary Figure S1. Bias assessment for the two RCTs.**

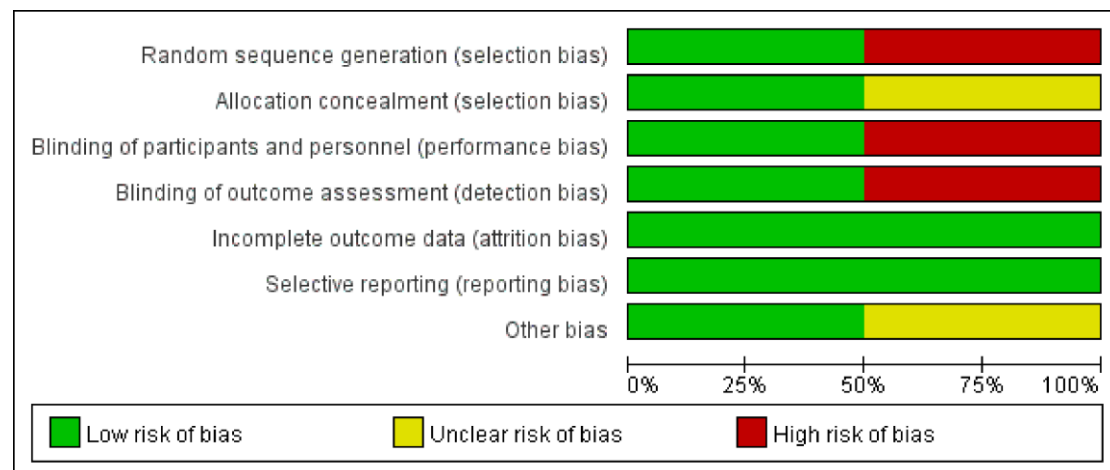

**Supplementary Figure S2. Funnel plot with Begg's test for publication bias.**

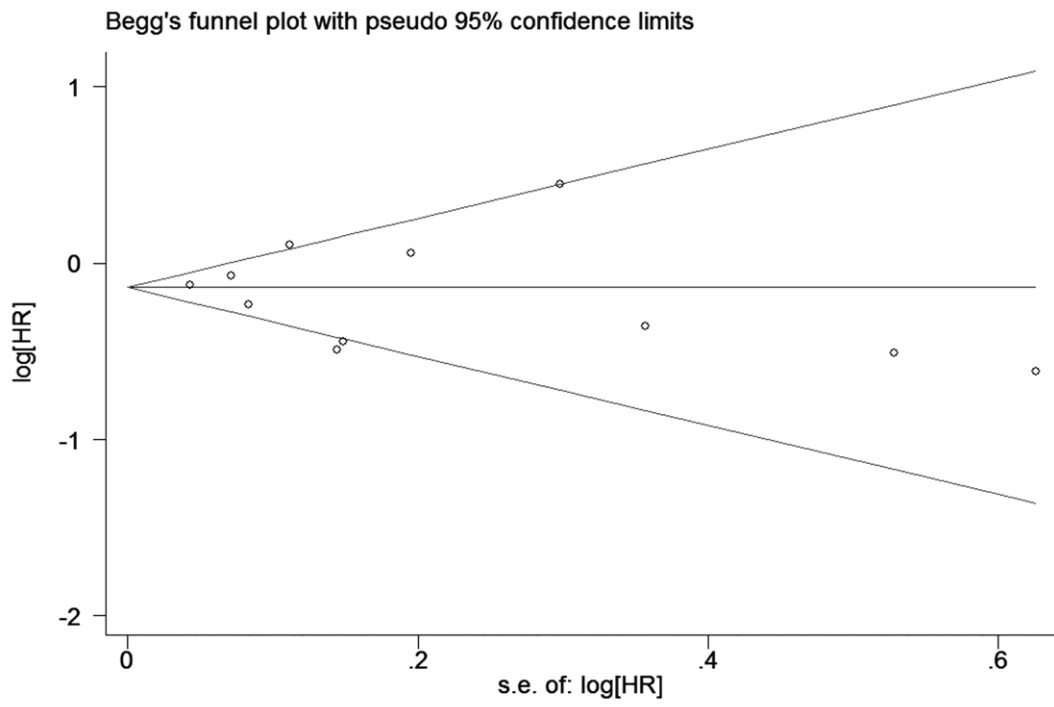

Supplement: 41598_2017_6207_MOESM1_ESM.pdf [file 41598_2017_6207_MOESM1_ESM.pdf]
